# Supplementary material for: pH triggered self-assembly structural transition of ionic liquids in aqueous solutions: smart use of pH-responsive additives
Source: Royal Society of Chemistry journal article supplement (doi:10.1039/c5ra12010a), 2015-01-01
Supplement: c5ra12010a1.pdf [file c5ra12010a1.pdf]

## Supporting Information

### pH Triggered Self-assembly Structural Transition of Ionic Liquids in Aqueous Solutions: Smart Use of pH-Responsive Additives

Huiyong Wang, Bo Tan, Hucheng Zhang and Jianji Wang\*

†Collaborative Innovation Center of Henan Province for Green Manufacturing of Fine Chemicals, School of Chemistry and Chemical Engineering, Key Laboratory of Green Chemical Media and Reactions, Ministry of Education, Henan Normal University, Xinxiang, Henan 453007, P. R. China

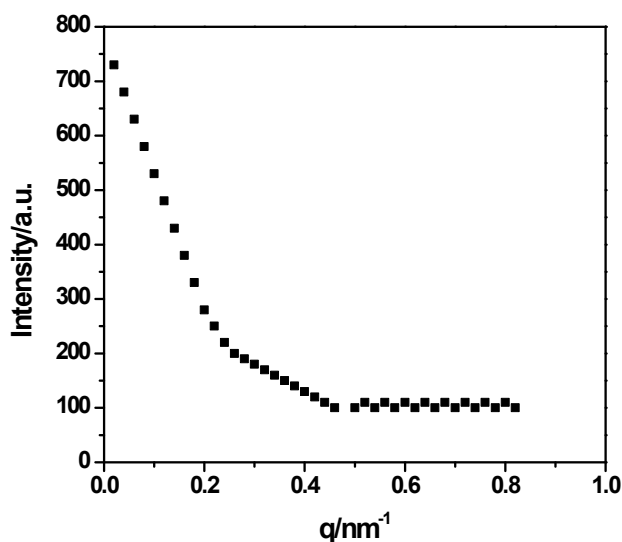

**Figure S1.** SAXS data for [C<sub>14</sub>mim]Br in aqueous 30 mM [C<sub>6</sub>H<sub>4</sub>COOKCOOH] solution at the IL concentration of 10 mM and pH 1.36. The lines were fitted by using a micelle model.

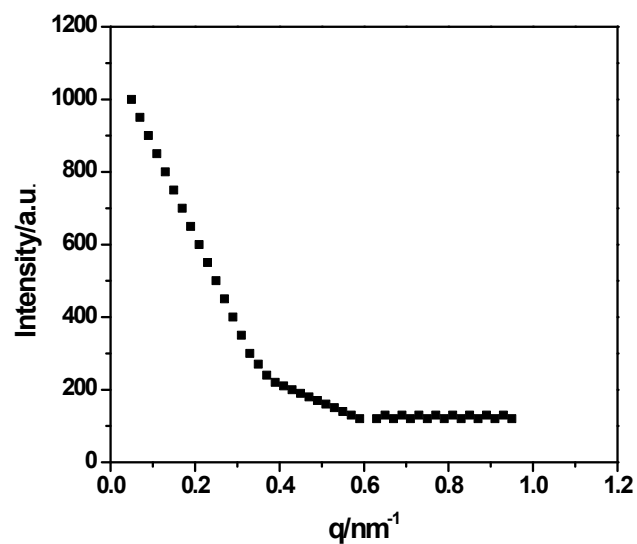

**Figure S2.** SAXS data for [C<sub>14</sub>mim]Br in aqueous 30 mM [C<sub>6</sub>H<sub>4</sub>COOKCOOH] solution at the IL concentration of 10 mM and pH 5.70. The lines were fitted by using a micelle model.
